# Supplementary material for: Glutamine synthetase-negative hepatocellular carcinoma has better prognosis and response to sorafenib treatment after hepatectomy
Source: PubMed Central journal article supplement — Chin Med J (Engl). 2023 May 29;136(17):2066–76. doi: 10.1097/CM9.0000000000002380 (PMC10476731; doi:10.1097/cm9.0000000000002380), 2023-05-29
Supplement: cm9-136-2066-s001.pdf [file cm9-136-2066-s001.pdf]

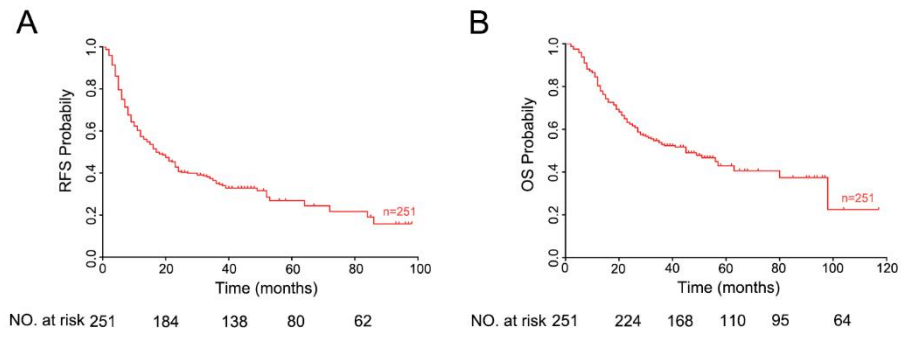

**Supplementary Figure 1.** Kaplan-Meier curves showing the RFS (A) and OS (B) of 251 patients who received only hepatectomy. GS: Glutamine synthetase; Arg1: Arginase 1; RFS: Recurrence-free survival; OS: Overall survival.

**A**

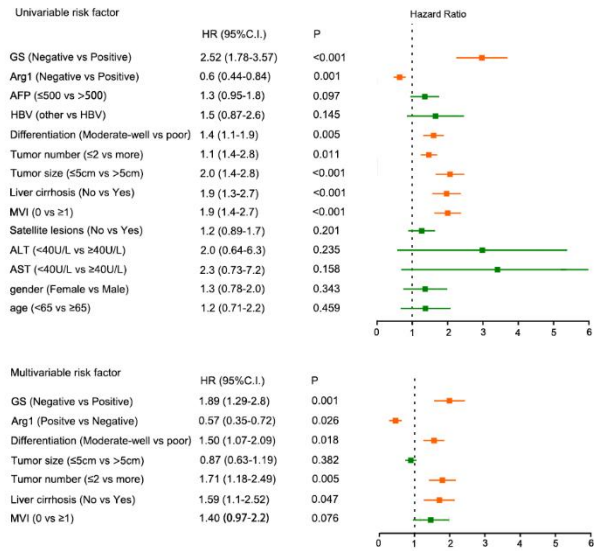

**B**

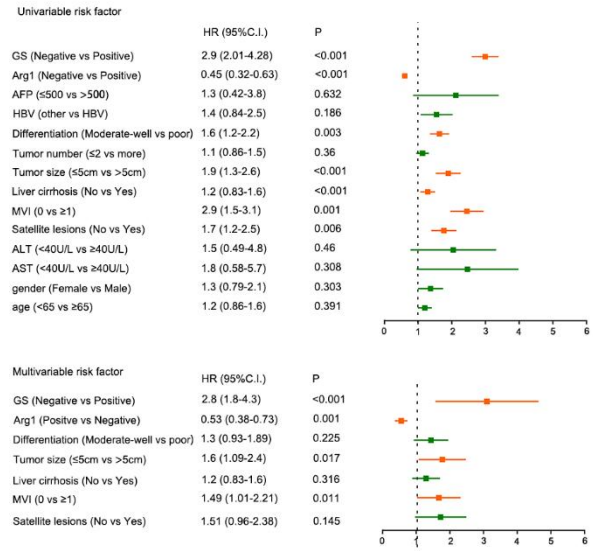

**Supplementary Figure 2.** Univariate and multivariate analyses of factors related to RFS (A) and OS (B). RFS: Recurrence-free survival; OS: Overall survival.

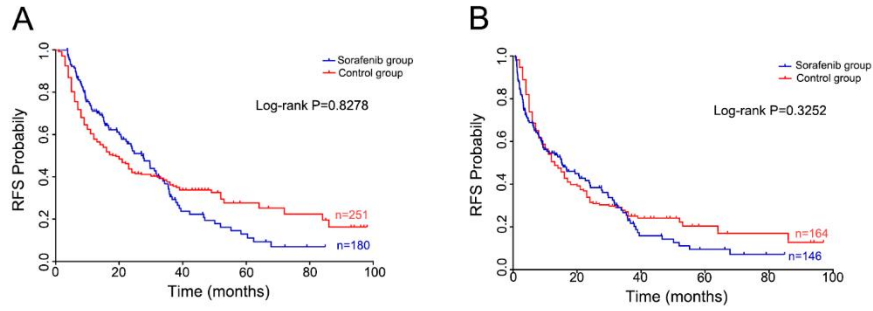

**Supplementary Figure 3.** Kaplan-Meier curves comparing the RFS between the sorafenib group and the control group in all HCC patients (A). Kaplan-Meier curves comparing the RFS between the sorafenib group and the control group in HCC patients with a high risk of recurrence (B). RFS: Recurrence-free survival; HCC: Hepatocellular carcinoma.

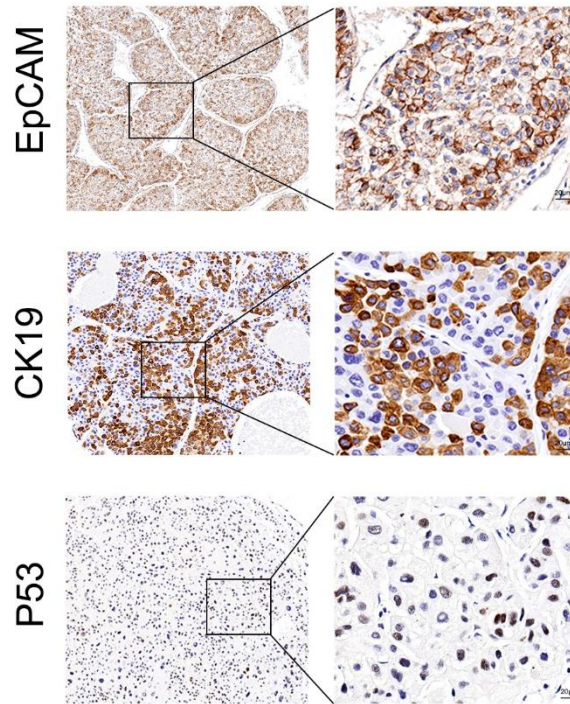

**Supplementary Figure 4.** Representative immunostaining of EpCAM, CK19, and mutant TP53 in HCC samples. HCC: Hepatocellular carcinoma.

**Supplementary Table 1.** Demographics of the HCC patient cohort who only received hepatectomy ( $n=251$ ).

| Characteristics                       | Total               |
|---------------------------------------|---------------------|
| Age, years (mean, min–max)            | 51 (23–83)          |
| Sex, $n$ (%)                          |                     |
| Female                                | 36 (14.34)          |
| Male                                  | 215 (85.65)         |
| PLT ( $10^9/L$ )                      | 158.8 (38–476)      |
| TBIL ( $\mu\text{mol/L}$ )            | 17.31 (0–391)       |
| ALT (U/L)                             | 48.4 (8–279)        |
| AST (U/L)                             | 51 (13–345)         |
| Neutrophil ( $10^9/L$ )               | 3.56 (0.086–40.000) |
| Lymphocyte ( $10^9/L$ )               | 1.59 (0.3–7.0)      |
| TP (g/L)                              | 70.60 (26–87)       |
| ALB (g/L)                             | 41.79 (20.4–77.0)   |
| GGT (U/L)                             | 104.93 (9–625)      |
| Satellite lesions                     | 43 (17.13)          |
| Serum AFP, $n$ (%)                    |                     |
| Low (serum AFP $\leq 500$ )           | 158 (62.95)         |
| High (serum AFP $> 500$ )             | 93 (37.05)          |
| Differentiation, $n$ (%)              |                     |
| Poor                                  | 132 (52.59)         |
| Moderate-well                         | 119 (47.41)         |
| Etiology, $n$ (%)                     |                     |
| Hepatitis B virus                     | 220 (87.65)         |
| Other                                 | 31 (12.35)          |
| Cirrhosis, $n$ (%)                    |                     |
| Yes                                   | 150 (59.76)         |
| No                                    | 101 (40.24)         |
| Tumor size, $n$ (%)                   |                     |
| Small (size $\leq 3$ cm)              | 34 (13.55)          |
| Medium ( $3 < \text{size} \leq 5$ cm) | 53 (21.11)          |
| Large (size $> 5$ cm)                 | 164 (65.34)         |
| Tumor number, $n$ (%)                 |                     |
| One                                   | 204 (81.27)         |
| Two                                   | 38 (15.14)          |
| More                                  | 9 (3.59)            |
| MVI                                   | 104 (41.43)         |
| Child-Pugh class, $n$ (%)             |                     |
| A                                     | 244 (97.21)         |
| B                                     | 7 (2.79)            |
| BCLC stage, $n$ (%)                   |                     |
| A                                     | 87 (34.66)          |
| B                                     | 134 (53.39)         |

|                          |             |
|--------------------------|-------------|
| C                        | 30 (11.95)  |
| Recurrence, <i>n</i> (%) |             |
| Yes                      | 154 (61.35) |
| No                       | 97 (38.65)  |
| Alive, <i>n</i> (%)      |             |
| Yes                      | 119 (40.41) |
| No                       | 132 (52.59) |

---

AFP: Alpha-fetoprotein; BCLC: Barcelona Clinic Liver Cancer; MVI: Microvascular invasion.

**Supplementary Table 2.** Baseline patient demographics and disease characteristics in the two groups of patients.

| Variable, n (%)                 | Total (n=431)         | Patient only received<br>hepatectomy (n=251) | Patients received<br>sorafenib after<br>hepatectomy (n=180) | P value |
|---------------------------------|-----------------------|----------------------------------------------|-------------------------------------------------------------|---------|
| Age                             | 51.3 (21.0–83.0)      | 51 (23.0–83.0)                               | 51.8 (21.0–74.0)                                            | 0.166   |
| Female/Male                     | 51/380                | 36/215                                       | 15/165                                                      | 0.0572  |
| PLT (10 <sup>9</sup> /L)        | 160.0 (30.0–476.0)    | 158.8 (38.0–476.0)                           | 136.0 (30.0–458.0)                                          | 0.3266  |
| TBIL (μmol/L)                   | 17.73 (0–391.00)      | 17.31 (0–391.00)                             | 16.58 (3.8.–71.2.)                                          | 0.0246  |
| ALT (U/L)                       | 42.06 (8.00–830.00)   | 48.40 (8.00–279.00)                          | 62.24 (8.00–830.00)                                         | <0.0001 |
| AST (U/L)                       | 53.55 (13.00–1513.00) | 51.00 (13.00–345.00)                         | 76.55 (30.00–1513.00)                                       | <0.0001 |
| Neutrophil (10 <sup>9</sup> /L) | 4.460 (0.086–58.400)  | 3.560 (0.086–40.000)                         | 4.030 (1.260–58.400)                                        | 0.1426  |
| Lymphocyte (10 <sup>9</sup> /L) | 9.97 (0.30–151.00)    | 1.59 (0.30–7.00)                             | 1.47 (0.30–151.00)                                          | 0.3265  |
| TP (g/L)                        | 71.26 (26.00–89.20)   | 70.60 (26.00–87.00)                          | 69.00 (26.00–89.20)                                         | 0.0001  |
| ALB (g/L)                       | 42.89 (5.40–77.00)    | 41.79 (20.40–77.00)                          | 42.40 (5.40–73.10)                                          | 0.144   |
| GGT (u/L)                       | 99.06 (9.00–1319.00)  | 104.93 (9.00–625.00)                         | 100.6 (12.0–1319.0)                                         | 0.0013  |
| Differentiation                 |                       |                                              |                                                             |         |
| Poor                            | 207 (48.03)           | 132 (52.59)                                  | 75 (41.67)                                                  | 0.0254  |
| Moderate-well                   | 224 (51.97)           | 119 (47.41)                                  | 105 (58.33)                                                 |         |
| Etiology, n (%)                 |                       |                                              |                                                             |         |
| Hep B                           | 387 (89.79)           | 220 (87.65)                                  | 167 (92.77)                                                 | 0.0838  |
| Other                           | 44 (10.21)            | 31 (12.35)                                   | 13 (7.23)                                                   |         |
| AFP                             |                       |                                              |                                                             |         |
| Low (serum AFP ≤ 500)           | 299 (69.37)           | 158 (62.95)                                  | 141 (78.33)                                                 | 0.0001  |
| High (serum AFP > 500)          | 132 (30.63)           | 93 (37.05)                                   | 39 (21.67)                                                  |         |
| Satellites                      | 148 (34.34)           | 43 (17.13)                                   | 105 (58.33)                                                 | <0.0001 |
| Cirrhosis                       |                       |                                              |                                                             |         |
| Yes                             | 247 (57.31)           | 150 (59.76)                                  | 97 (53.88)                                                  | <0.0001 |
| No                              | 204 (42.69)           | 101 (40.24)                                  | 103 (46.12)                                                 |         |
| Tumor size                      |                       |                                              |                                                             |         |
| Small (size ≤ 3 cm)             | 77 (17.87)            | 34 (13.55)                                   | 43 (23.33)                                                  |         |
| Medium (3 < size ≤ 5 cm)        | 90 (20.88)            | 53 (21.11)                                   | 37 (20.56)                                                  | 0.286   |
| Large (size > 5 cm)             | 264 (61.25)           | 164 (65.34)                                  | 100 (55.11)                                                 |         |
| Tumor number                    |                       |                                              |                                                             |         |
| One                             | 373 (86.54)           | 204 (81.27)                                  | 169 (93.88)                                                 | 0.0005  |
| Two                             | 42 (9.74)             | 38 (15.14)                                   | 4 (2.22)                                                    |         |
| More                            | 16 (3.71)             | 9 (3.59)                                     | 7 (3.90)                                                    |         |
| MVI (≥ 1)                       | 260 (60.32)           | 104 (41.43)                                  | 156 (86.66)                                                 | 0.0001  |
| Child-Pugh class, n (%)         |                       |                                              |                                                             |         |
| A                               | 420 (97.44)           | 244 (97.21)                                  | 176 (97.78)                                                 | 0.7682  |
| B                               | 11 (2.56)             | 7 (2.79)                                     | 4 (2.22)                                                    |         |

|                   |             |             |            |        |
|-------------------|-------------|-------------|------------|--------|
| BCLC stage, n (%) |             |             |            |        |
| A                 | 121 (28.07) | 87 (34.66)  | 34 (18.87) | 0.0008 |
| B                 | 260 (60.32) | 134 (53.39) | 126 (70)   |        |
| C                 | 50 (11.61)  | 30 (11.95)  | 20 (11.13) |        |
| GS & Arg1 in HCC  |             |             |            |        |
| GS-Arg1-          | 56 (12.99)  | 30 (11.95)  | 26 (14.44) | 0.1782 |
| GS-Arg1+          | 63 (14.62)  | 35 (13.94)  | 28 (15.56) |        |
| GS+Arg1-          | 187 (43.39) | 120 (47.81) | 67 (37.22) |        |
| GS+Arg1+          | 125 (29.00) | 66 (26.30)  | 59 (32.78) |        |

AFP: Alpha-fetoprotein; BCLC: Barcelona Clinic Liver Cancer; MVI: Microvascular invasion; GS: Glutamine synthetase;

Arg1: Arginase 1.



**Supplementary Table 3.** The relationship between HCC recurrence and clinical risk factors.

| Predictor       | Variables                     | Recurrence        |                  | <i>P</i>          |
|-----------------|-------------------------------|-------------------|------------------|-------------------|
|                 |                               | Yes, <i>n</i> (%) | No, <i>n</i> (%) |                   |
| Sex             | Female                        | 21 (58.33)        | 15 (41.67)       | 0.0541            |
|                 | Male                          | 159 (73.95)       | 56 (26.05)       |                   |
| Etiology        | Hepatitis B virus             | 156 (70.91)       | 64 (29.09)       | 0.4521            |
|                 | Other                         | 24 (77.42)        | 7 (22.58)        |                   |
| Serum AFP       | Low (serum AFP $\leq$ 500)    | 108 (68.35)       | 50 (31.65)       | 0.1235            |
|                 | High (serum AFP > 500)        | 72 (77.42)        | 21 (22.58)       |                   |
| Tumor number    | One                           | 138 (68.32)       | 64 (31.68)       | <b>0.0148</b>     |
|                 | Two                           | 34 (89.47)        | 4 (10.53)        |                   |
|                 | More                          | 8 (88.89)         | 1 (11.11)        |                   |
| Tumor size      | Small (size $\leq$ 3 cm)      | 20 (48.78)        | 21 (51.22)       | <b>&lt;0.0001</b> |
|                 | Medium (3 < size $\leq$ 5 cm) | 34 (58.62)        | 24 (41.38)       |                   |
|                 | Large (size > 5 cm)           | 126 (82.89)       | 26 (17.11)       |                   |
| Cirrhosis       | Yes                           | 73 (72.28)        | 28 (27.72)       | 0.8707            |
|                 | No                            | 107 (71.33)       | 43 (28.67)       |                   |
| Differentiation | Poor                          | 88 (66.67)        | 44 (33.33)       | <b>0.0428</b>     |
|                 | Moderate-well                 | 93 (78.15)        | 26 (21.85)       |                   |
| MVI             | 0                             | 83 (56.46)        | 64 (43.54)       | <b>&lt;0.0001</b> |
|                 | $\geq$ 1                      | 97 (93.27)        | 7 (6.73)         |                   |

AFP: Alpha-fetoprotein; BCLC: Barcelona Clinic Liver Cancer; MVI: Microvascular invasion.

**Supplementary Table 4.** Baseline patient demographics and disease characteristics in GS+ or GS- group of the patients

who received only hepatectomy.

| Variable, <i>n</i> (%)                | Total ( <i>n</i> =251) | GS+ group ( <i>n</i> =186) | GS- group ( <i>n</i> =65) | GS+ vs GS- <i>P</i> value |
|---------------------------------------|------------------------|----------------------------|---------------------------|---------------------------|
| Age                                   | 51 (23–83)             | 50 (26–82)                 | 52 (24–78)                | 0.1821                    |
| Female/Male                           | 36/215                 | 23/163                     | 13/52                     | 0.1508                    |
| PLT ( $10^9/L$ )                      | 158.8 (38.0–476.0)     | 159.0 (38.0–476.0)         | 151.0 (42.0–395.0)        | 0.393                     |
| TBIL ( $\mu\text{mol/L}$ )            | 17.31 (0–391.00)       | 17.93 (0–391.00)           | 16.46 (4.20–333.00)       | 0.3576                    |
| ALT (U/L)                             | 48.40 (8.00–279.00)    | 49.96 (9.00–279.00)        | 55.34 (8.00–258.00)       | 0.1011                    |
| AST (U/L)                             | 51.00 (13.00–345.00)   | 50.19 (13–345)             | 53.09 (17.00–167.00)      | 0.6154                    |
| Neutrophil ( $10^9/L$ )               | 3.56 (0.086–40.00)     | 3.08 (0.86–11.48)          | 2.98 (1.29–7.59)          | 0.6754                    |
| Lymphocyte ( $10^9/L$ )               | 1.59 (0.30–7.00)       | 1.58 (0.30–4.88)           | 1.60 (0.52–7.00)          | 0.8333                    |
| TP (g/L)                              | 70.60 (26.00–87.00)    | 70.46 (30.60–87.00)        | 70.98 (26.00–83.90)       | 0.6175                    |
| ALB (g/L)                             | 41.79 (20.40–77.00)    | 41.56 (20.40–77.00)        | 42.48 (33.80–73.10)       | 0.2254                    |
| GGT (u/L)                             | 104.93 (9.00–625.00)   | 100.60 (9.00–625.00)       | 117.50 (13.00–572.00)     | 0.2322                    |
| Satellite lesions                     | 43 (17.13)             | 34 (18.28)                 | 9 (13.85)                 | 0.4141                    |
| Serum AFP, <i>n</i> (%)               |                        |                            |                           |                           |
| Low (serum AFP $\leq 500$ )           | 158 (62.95)            | 116 (62.37)                | 42 (64.61)                | 0.7465                    |
| High (serum AFP $> 500$ )             | 93 (37.05)             | 70 (37.63)                 | 23 (35.39)                |                           |
| Differentiation, <i>n</i> (%)         |                        |                            |                           |                           |
| Poor                                  | 132 (52.59)            | 92 (49.46)                 | 40 (61.54)                | 0.0933                    |
| Moderate-well                         | 119 (47.41)            | 94 (50.54)                 | 25 (38.46)                |                           |
| Etiology, <i>n</i> (%)                |                        |                            |                           |                           |
| Hepatitis B virus                     | 220 (87.65)            | 167 (89.78)                | 53 (81.54)                | 0.0819                    |
| Other                                 | 31 (12.35)             | 19 (10.22)                 | 12 (18.46)                |                           |
| Cirrhosis, <i>n</i> (%)               |                        |                            |                           |                           |
| Yes                                   | 150 (59.76)            | 111 (59.68)                | 39 (60)                   | 0.9636                    |
| No                                    | 101 (40.24)            | 75 (40.32)                 | 26 (40)                   |                           |
| Tumor size                            |                        |                            |                           |                           |
| Small (size $\leq 3$ cm)              | 34 (13.55)             | 26 (13.98)                 | 8 (12.31)                 | 0.1764                    |
| Medium ( $3 < \text{size} \leq 5$ cm) | 53 (21.11)             | 34 (18.27)                 | 19 (29.23)                |                           |
| Large (size $> 5$ cm)                 | 164 (65.34)            | 126 (67.75)                | 38 (58.43)                |                           |
| Tumor number                          |                        |                            |                           |                           |
| One                                   | 204 (81.27)            | 154 (82.80)                | 50 (76.92)                | 0.1651                    |
| Two                                   | 38 (15.14)             | 24 (12.93)                 | 14 (21.54)                |                           |
| More                                  | 9 (3.59)               | 8 (4.27)                   | 1 (1.54)                  |                           |
| MVI                                   | 104 (41.43)            | 79 (42.47)                 | 25 (38.46)                | 0.5719                    |
| Child-Pugh class, <i>n</i> (%)        |                        |                            |                           |                           |
| A                                     | 244 (97.21)            | 181 (97.31)                | 63 (96.92)                | 0.84                      |

|                          |             |            |            |        |
|--------------------------|-------------|------------|------------|--------|
| B                        | 7 (2.79)    | 5 (2.69)   | 2 (3.08)   |        |
| BCLC stage, <i>n</i> (%) |             |            |            |        |
| A                        | 87 (34.66)  | 65 (34.95) | 22 (33.85) |        |
| B                        | 134 (53.39) | 99 (53.23) | 35 (53.84) | 0.9853 |
| C                        | 30 (11.95)  | 22 (11.82) | 8 (12.31)  |        |

---

AFP: Alpha-fetoprotein; BCLC: Barcelona Clinic Liver Cancer; MVI: Microvascular invasion.

**Supplementary Table 5.** Baseline patient demographics and disease characteristics in Arg1+ or Arg1- group of the patients who only received hepatectomy.

| Variable, <i>n</i> (%)          | Total ( <i>n</i> =251) | Arg1+ group ( <i>n</i> =101) | Arg1- group ( <i>n</i> =150) | Arg1+ vs Arg1- <i>P</i> value |
|---------------------------------|------------------------|------------------------------|------------------------------|-------------------------------|
| Age                             | 51.00 (23.00–83.00)    | 51.60 (29.00–78.00)          | 50.04 (23.00–83.00)          | 0.2897                        |
| Female/Male                     | 36/215                 | 11/90                        | 25/125                       | 0.2704                        |
| PLT (10 <sup>9</sup> /L)        | 158.8 (38.0–476.0)     | 157.7 (42.0–475.0)           | 159.5 (38.0–476.0)           | 0.8651                        |
| TBIL (μmol/L)                   | 17.31 (0–391.00)       | 14.53 (0–344.00)             | 19.14 (0–391.00)             | 0.1766                        |
| ALT (U/L)                       | 48.40 (8.00–279.00)    | 44.43 (9.00–235.00)          | 50.92 (10.00–279.00)         | 0.2046                        |
| AST (U/L)                       | 51 (13–345)            | 51.27 (13–291)               | 50.72 (15.00–345.00)         | 0.9156                        |
| Neutrophil (10 <sup>9</sup> /L) | 3.560 (0.086–40.000)   | 3.640 (0.860–40.000)         | 3.560 (1.200–11.450)         | 0.2886                        |
| Lymphocyte (10 <sup>9</sup> /L) | 1.59 (0.30–7.00)       | 1.63 (0.30–7.00)             | 1.56 (0.42–4.88)             | 0.431                         |
| TP (g/L)                        | 70.60 (26.00–87.00)    | 70.97 (26.00–84.40)          | 70.34 (38.60–87.00)          | 0.4991                        |
| ALB (g/L)                       | 41.79 (20.40–77.00)    | 42.38 (32.40–73.00)          | 41.41 (20.40–77.00)          | 0.152                         |
| GGT (u/L)                       | 104.93 (9.00–625.00)   | 106.10 (13.00–425.00)        | 104.3 (9.00–425.00)          | 0.8841                        |
| Satellite lesions               | 43 (17.13)             | 17 (16.83)                   | 26 (17.33)                   | 0.9176                        |
| Serum AFP, <i>n</i> (%)         |                        |                              |                              |                               |
| Low (serum AFP ≤ 500)           | 158 (62.95)            | 67 (66.34)                   | 91 (60.67)                   | 0.3617                        |
| High (serum AFP > 500)          | 93 (37.05)             | 34 (33.66)                   | 59 (39.33)                   |                               |
| Differentiation, <i>n</i> (%)   |                        |                              |                              |                               |
| Poor                            | 132 (52.59)            | 57 (56.44)                   | 75 (50)                      | 0.3167                        |
| Moderate-well                   | 119 (47.41)            | 44 (43.56)                   | 75 (50)                      |                               |
| Etiology, <i>n</i> (%)          |                        |                              |                              |                               |
| Hepatitis B virus               | 220 (87.65)            | 87 (86.14)                   | 133 (88.67)                  | 0.5505                        |
| Other                           | 31 (12.35)             | 14 (13.86)                   | 17 (11.33)                   |                               |
| Cirrhosis, <i>n</i> (%)         |                        |                              |                              |                               |
| Yes                             | 150 (59.76)            | 60 (49.41)                   | 90 (60)                      | 0.925                         |
| No                              | 101 (40.24)            | 41 (40.59)                   | 60 (40)                      |                               |
| Tumor size                      |                        |                              |                              |                               |
| Small (size ≤ 3 cm)             | 34 (13.55)             | 12 (11.88)                   | 22 (14.67)                   |                               |
| Medium (3 < size ≤ 5 cm)        | 53 (21.11)             | 22 (21.78)                   | 31 (20.67)                   | 0.8158                        |
| Large (size > 5 cm)             | 164 (65.34)            | 67 (66.34)                   | 97 (64.66)                   |                               |
| Tumor number                    |                        |                              |                              |                               |
| One                             | 204 (81.27)            | 83 (82.18)                   | 121 (80.67)                  | 0.8757                        |
| Two                             | 38 (15.14)             | 14 (13.86)                   | 24 (16)                      |                               |
| More                            | 9 (3.59)               | 4 (3.96)                     | 5 (3.33)                     |                               |
| MVI                             | 104 (41.43)            | 43 (42.57)                   | 61 (40.67)                   | 0.7635                        |
| Child-Pugh class, <i>n</i> (%)  |                        |                              |                              | 0.8861                        |

|                          |             |            |             |        |
|--------------------------|-------------|------------|-------------|--------|
| A                        | 244 (97.21) | 98 (97.03) | 146 (97.33) |        |
| B                        | 7 (2.79)    | 3 (2.97)   | 4 (2.67)    |        |
| BCLC stage, <i>n</i> (%) |             |            |             |        |
| A                        | 87 (34.66)  | 29 (28.71) | 58 (38.67)  | 0.1354 |
| B                        | 134 (53.39) | 56 (55.45) | 78 (52)     |        |
| C                        | 30 (11.95)  | 16 (15.84) | 14 (9.33)   |        |

---

AFP: Alpha-fetoprotein; BCLC: Barcelona Clinic Liver Cancer; MVI: Icrovascular invasion.
